# Supplementary material for: Fabrication of an (α-Mn2O3:Co)-decorated CNT highly sensitive screen printed electrode for the optimization and electrochemical determination of cyclobenzaprine hydrochloride using response surface methodology
Source: Royal Society of Chemistry journal article supplement (doi:10.1039/d0ra05106c), 2020-01-01
Supplement: d0ra05106c1.pdf [file d0ra05106c1.pdf]

**Table 1S: Build information of variables specification and experimental domain factors**

| Factor         | Name                                                  | Units | Minimum<br>- $\alpha$ | Maximum<br>+ $\alpha$ | Coded<br>Low<br>(-1) | Coded<br>High<br>(+1) | Mean<br>Centre<br>point<br>(0) |
|----------------|-------------------------------------------------------|-------|-----------------------|-----------------------|----------------------|-----------------------|--------------------------------|
| X <sub>1</sub> | $\alpha$ -<br>Mn <sub>2</sub> O <sub>3</sub> :Co@CNTs | mg    | 23.18                 | 56.82                 | 30.00                | 50.00                 | 40.00                          |
| X <sub>2</sub> | Functionalized CNTs                                   | mg    | 6.36                  | 73.64                 | 20.00                | 60.00                 | 40.00                          |
| X <sub>3</sub> | Ion pair                                              | mg    | 56.59                 | 73.41                 | 60.00                | 70.00                 | 65.00                          |

**Table 2S: Central composite design (CCD) for experimental variables and slope response**

|     |     | Factor 1                                               | Factor 2                 | Factor 3      | Response 1 |
|-----|-----|--------------------------------------------------------|--------------------------|---------------|------------|
| Std | Run | A<br>$\alpha$ -Mn <sub>2</sub> O <sub>3</sub> :Co@CNTs | B:Functionalized<br>CNTs | C:Ion<br>pair | Slope      |
|     |     | mg                                                     | mg                       | mg            | mV/decade  |
|     | 1   | 30                                                     | 20                       | 60            | 55.5       |
|     | 2   | 50                                                     | 20                       | 60            | 57.4       |
|     | 3   | 30                                                     | 60                       | 60            | 55         |
|     | 4   | 50                                                     | 60                       | 60            | 58.6       |
|     | 5   | 30                                                     | 20                       | 70            | 58.8       |
|     | 6   | 50                                                     | 20                       | 70            | 57         |
|     | 7   | 30                                                     | 60                       | 70            | 58.5       |
|     | 8   | 50                                                     | 60                       | 70            | 58.7       |
|     | 9   | 23.1821                                                | 40                       | 65            | 58.1       |
|     | 10  | 56.8179                                                | 40                       | 65            | 59.5       |
|     | 11  | 40                                                     | 6.36414                  | 65            | 56         |
|     | 12  | 40                                                     | 73.6359                  | 65            | 56.8       |
|     | 13  | 40                                                     | 40                       | 56.591        | 56.3       |
|     | 14  | 40                                                     | 40                       | 73.409        | 59.1       |
|     | 15  | 40                                                     | 40                       | 65            | 58.2       |
|     | 16  | 40                                                     | 40                       | 65            | 58.2       |
|     | 17  | 40                                                     | 40                       | 65            | 58.3       |
|     | 18  | 40                                                     | 40                       | 65            | 58.3       |
|     | 19  | 40                                                     | 40                       | 65            | 58.5       |
|     | 20  | 40                                                     | 40                       | 65            | 58.2       |

**Table 3S: fitting summary for the suggested experimental design.**

| Source           | Sequential p-value | Lack of Fit p-value | Adjusted R <sup>2</sup> | Predicted R <sup>2</sup> |                  |
|------------------|--------------------|---------------------|-------------------------|--------------------------|------------------|
| Linear           | 0.0231             | < 0.0001            | 0.3340                  | 0.0073                   |                  |
| 2FI              | 0.0289             | < 0.0001            | 0.5810                  | 0.3569                   |                  |
| <b>Quadratic</b> | <b>&lt; 0.0001</b> | <b>0.3086</b>       | <b>0.9885</b>           | <b>0.9679</b>            | <b>Suggested</b> |
| Cubic            | 0.8540             | 0.0623              | 0.9843                  | 0.4119                   | Aliased          |

**Warning:** The Cubic model is aliased.

**Table 4S ANOVA for Quadratic model**

| Source                                               | Sum of Squares | Mean Square | F-value | p-value  |                        |
|------------------------------------------------------|----------------|-------------|---------|----------|------------------------|
| <b>Model</b>                                         | 29.27          | 3.25        | 182.85  | < 0.0001 | <b>significant</b>     |
| A- $\alpha$ -Mn <sub>2</sub> O <sub>3</sub> :Co@CNTs | 2.86           | 2.86        | 161.03  | < 0.0001 |                        |
| B- Functionalized CNTs                               | 0.8692         | 0.8692      | 48.87   | < 0.0001 |                        |
| C-Ion pair                                           | 9.20           | 9.20        | 517.21  | < 0.0001 |                        |
| AB                                                   | 1.71           | 1.71        | 96.20   | < 0.0001 |                        |
| AC                                                   | 6.30           | 6.30        | 354.25  | < 0.0001 |                        |
| BC                                                   | 0.0612         | 0.0612      | 3.44    | 0.0932   |                        |
| A <sup>2</sup>                                       | 0.3228         | 0.3228      | 18.15   | 0.0017   |                        |
| B <sup>2</sup>                                       | 7.04           | 7.04        | 395.70  | < 0.0001 |                        |
| C <sup>2</sup>                                       | 0.8249         | 0.8249      | 46.37   | < 0.0001 |                        |
| <b>Residual</b>                                      | 0.1779         | 0.0178      |         |          |                        |
| Lack of Fit                                          | 0.1095         | 0.0219      | 1.60    | 0.3086   | <b>not significant</b> |
| Pure Error                                           | 0.0683         | 0.0137      |         |          |                        |
| <b>Cor Total</b>                                     | 29.45          |             |         |          |                        |

The **Model F-value** of 182.85 implies the model is significant. There is only a 0.01% chance that an F-value this large could occur due to noise.

**P-values** less than 0.0500 indicate model terms are significant. In this case A, B, C, AB, AC, A<sup>2</sup>, B<sup>2</sup>, C<sup>2</sup> are significant model terms.

**Table 5S Fit Statistics**

|                  |        |                                |         |
|------------------|--------|--------------------------------|---------|
| <b>Std. Dev.</b> | 0.1334 | <b>R<sup>2</sup></b>           | 0.9940  |
| <b>Mean</b>      | 57.75  | <b>Adjusted R<sup>2</sup></b>  | 0.9885  |
| <b>C.V. %</b>    | 0.2309 | <b>Predicted R<sup>2</sup></b> | 0.9679  |
|                  |        | <b>Adeq Precision</b>          | 47.1430 |

The **Predicted R<sup>2</sup>** of 0.9679 is in reasonable agreement with the **Adjusted R<sup>2</sup>** of 0.9885; i.e. the difference is less than 0.2.

**Adeq Precision** measures the signal to noise ratio. A ratio greater than 4 is desirable. Your ratio of 47.143 indicates an adequate signal.

**Table 6S: Solutions determination of optimum response.**

| Number | $\alpha$ -<br>Mn <sub>2</sub> O <sub>3</sub> :Co@CNTs | Functionalized<br>CNTs | Ion pair      | Slope         | Desirability |                 |
|--------|-------------------------------------------------------|------------------------|---------------|---------------|--------------|-----------------|
| 1      | 49.389                                                | 46.809                 | 64.591        | 59.000        | 1.000        |                 |
| 2      | 35.844                                                | 45.878                 | 69.602        | 59.000        | 1.000        |                 |
| 3      | <b>49.660</b>                                         | <b>50.038</b>          | <b>67.255</b> | <b>59.000</b> | <b>1.000</b> | <b>Selected</b> |
| 4      | 49.782                                                | 47.676                 | 62.630        | 59.000        | 1.000        |                 |
| 5      | 30.521                                                | 24.294                 | 69.743        | 59.000        | 1.000        |                 |
| 6      | 45.660                                                | 47.039                 | 69.252        | 59.000        | 1.000        |                 |
| 7      | 36.057                                                | 45.290                 | 69.623        | 59.000        | 1.000        |                 |
| 8      | 49.316                                                | 49.127                 | 66.491        | 59.000        | 1.000        |                 |
| 9      | 49.302                                                | 50.729                 | 64.379        | 59.000        | 1.000        |                 |
| 10     | 49.620                                                | 50.089                 | 67.196        | 59.000        | 1.000        |                 |

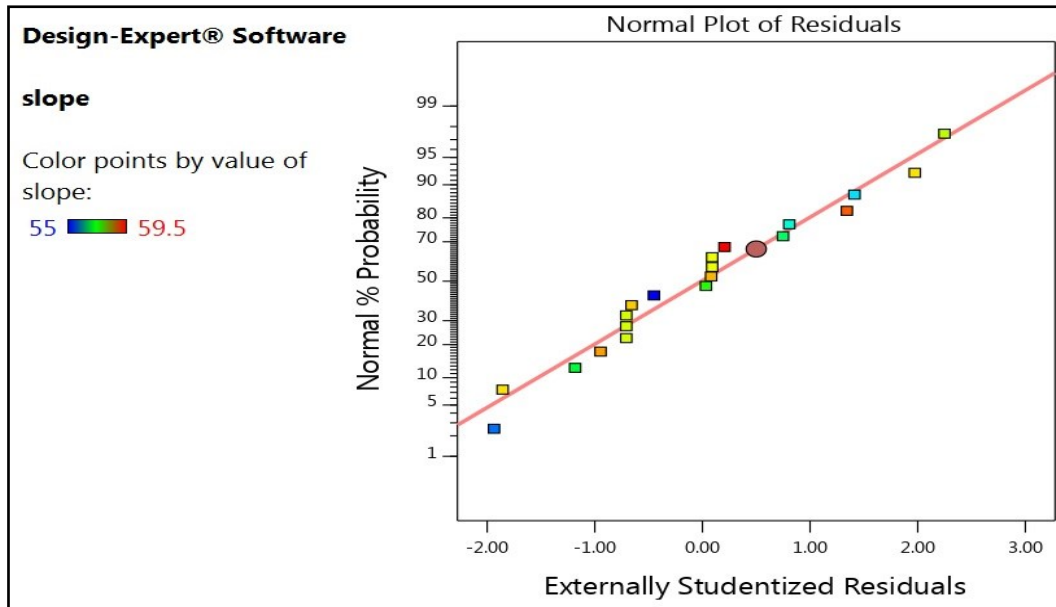

(A)

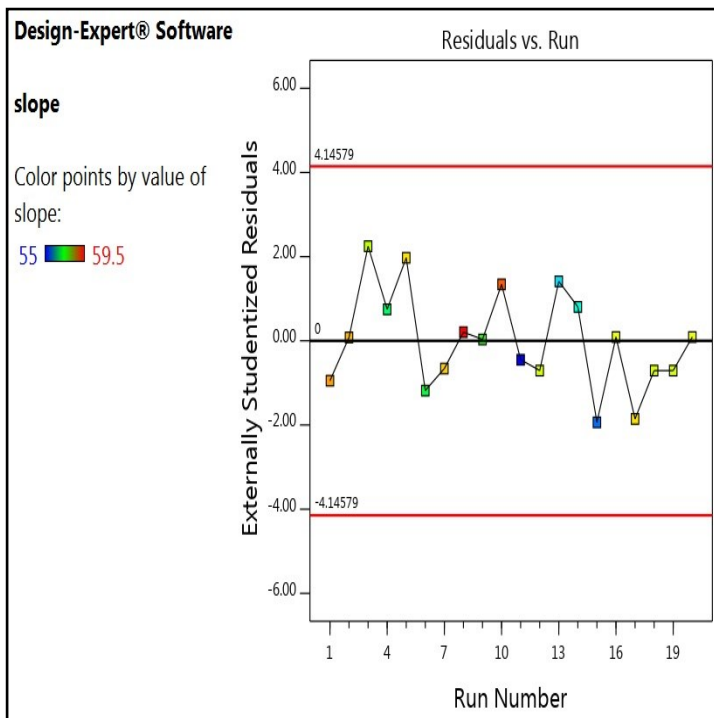

(B)

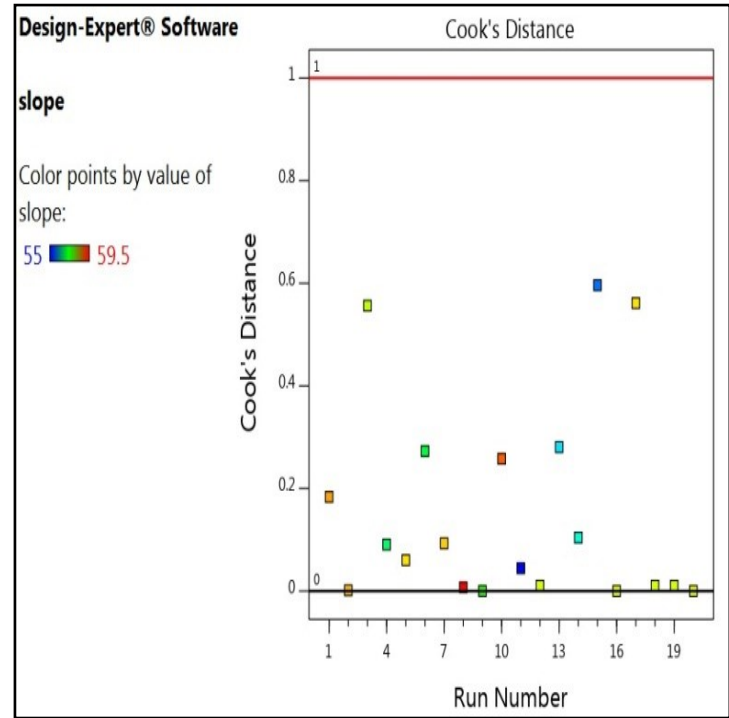

(C)

Fig. 1S: Normal probability plot of the residuals (A), residuals versus run (B), cook's distance (C).

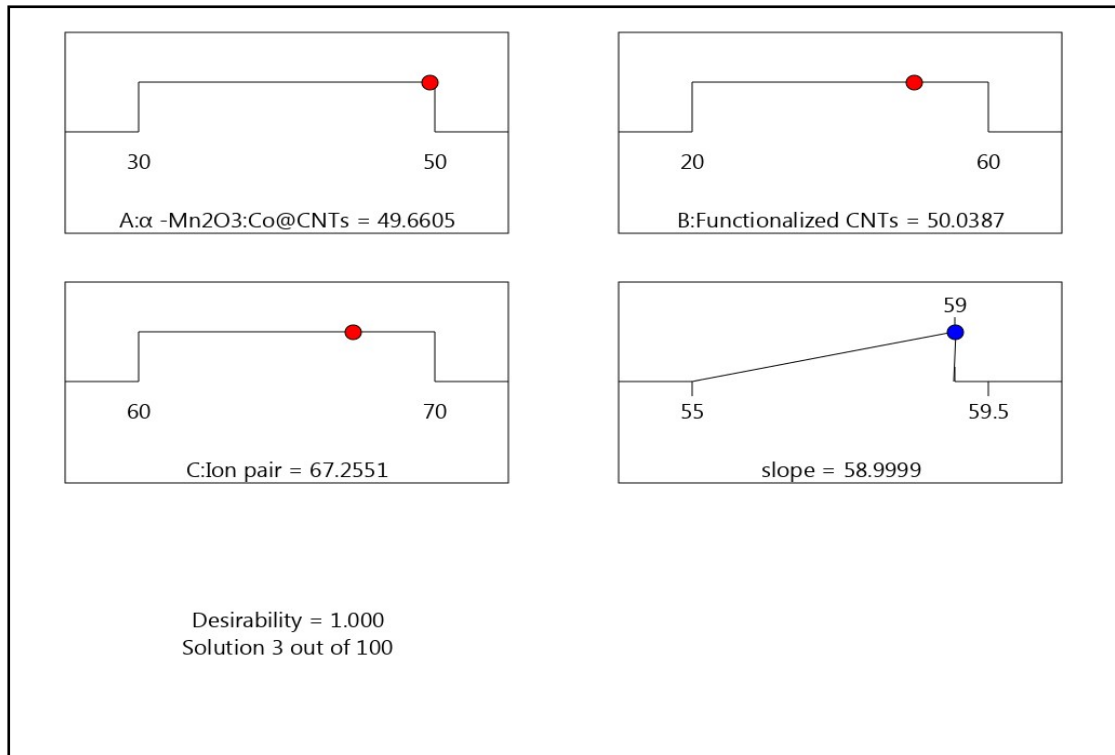

Fig. 2S: Numerical optimization ramps view for solutions.

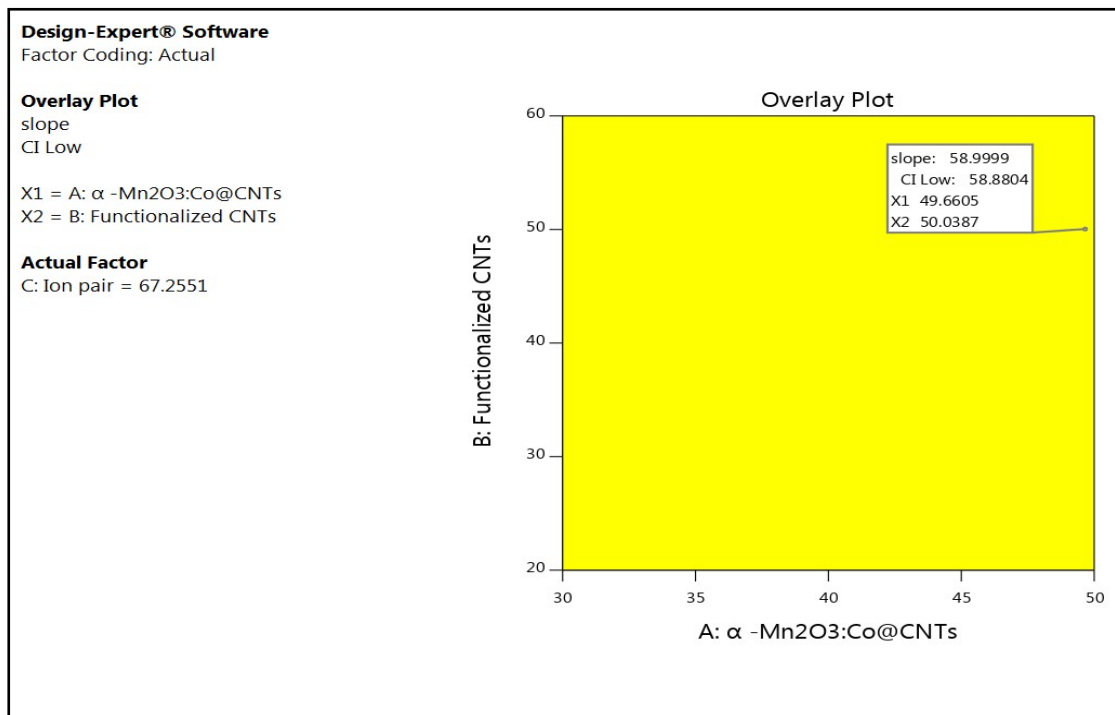

Fig. 3S: overlay desirability plot.

**Design-Expert® Software**

Factor Coding: Actual

**Desirability**

0.000  1.000

X1 = A:  $\alpha$ -Mn<sub>2</sub>O<sub>3</sub>:Co@CNTs

X2 = B: Functionalized CNTs

**Actual Factor**

C: Ion pair = 67.2551

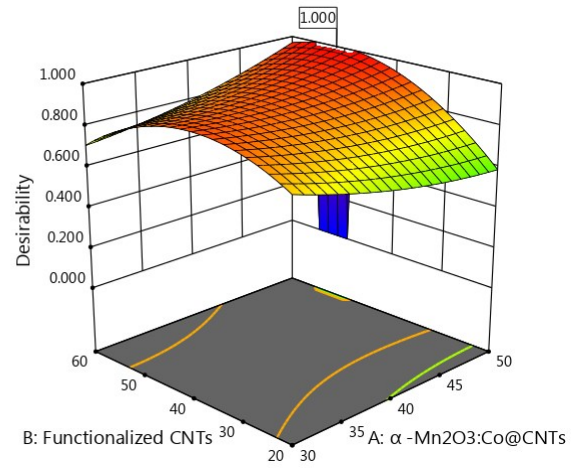

Fig. 4S: 3D desirability plot.
